# Supplementary material for: Efficacy, safety and tolerability of tofacitinib in patients with an inadequate response to disease modifying anti-rheumatic drugs: a meta-analysis of randomized double-blind controlled studies
Source: PubMed Central journal article supplement (PMC4222887; doi:10.1186/1471-2474-14-332), 2013-11-26

**Additional file 3.** Standardize mean difference of change in HDL cholesterol level from baseline (mg/dl)

| Studies (dose)                                   | SMD          | (95% CI)               |
|--------------------------------------------------|--------------|------------------------|
| Burmester GR et al (10mg)                        | 0.694        | (0.446, 0.941)         |
| Fleischmann R et al study1 (10mg)                | 0.739        | (0.306, 1.171)         |
| Fleischmann R et al study2 (10mg)                | 0.745        | (0.521, 0.969)         |
| Kremer JM et al study1 (10mg)                    | 0.545        | (0.211, 0.879)         |
| van Vollenhoven RF et al (10mg)                  | 0.655        | (0.416, 0.893)         |
| <b>Subgroup 10 (I<sup>2</sup>=0% , P=0.898)</b>  | <b>0.683</b> | <b>(0.561, 0.804)</b>  |
| Burmester GR et al (5mg)                         | 0.607        | (0.361, 0.853)         |
| Fleischmann R et al study1 (5mg)                 | 0.186        | (-0.291, 0.662)        |
| Fleischmann R et al study2 (5mg)                 | 0.626        | (0.404, 0.848)         |
| Kremer JM et al study1 (5mg)                     | 0.606        | (0.267, 0.945)         |
| Kremer JM et al study2 (5mg)                     | 2.519        | (2.051, 2.987)         |
| van Vollenhoven RF et al (5mg)                   | 0.597        | (0.358, 0.835)         |
| <b>Subgroup 5 (I<sup>2</sup>=92% , P=0.000)</b>  | <b>0.848</b> | <b>(0.194, 1.502)</b>  |
| Fleischmann R et al study1 (15mg)                | 0.619        | (0.185, 1.053)         |
| Kremer JM et al study1 (15mg)                    | 0.666        | (0.330, 1.002)         |
| Kremer JM et al study2 (15mg)                    | 5.966        | (5.175, 6.756)         |
| <b>Subgroup 15 (I<sup>2</sup>=99% , P=0.000)</b> | <b>2.402</b> | <b>(-1.069, 5.872)</b> |
| Fleischmann R et al study1 (3mg)                 | 0.183        | (-0.252, 0.618)        |
| Kremer JM et al study1 (3mg)                     | 0.500        | (0.159, 0.840)         |
| <b>Subgroup 3 (I<sup>2</sup>=21% , P=0.261)</b>  | <b>0.372</b> | <b>(0.067, 0.676)</b>  |
| <b>Overall (I<sup>2</sup>=94% , P=0.000)</b>     | <b>1.007</b> | <b>(0.332, 1.682)</b>  |

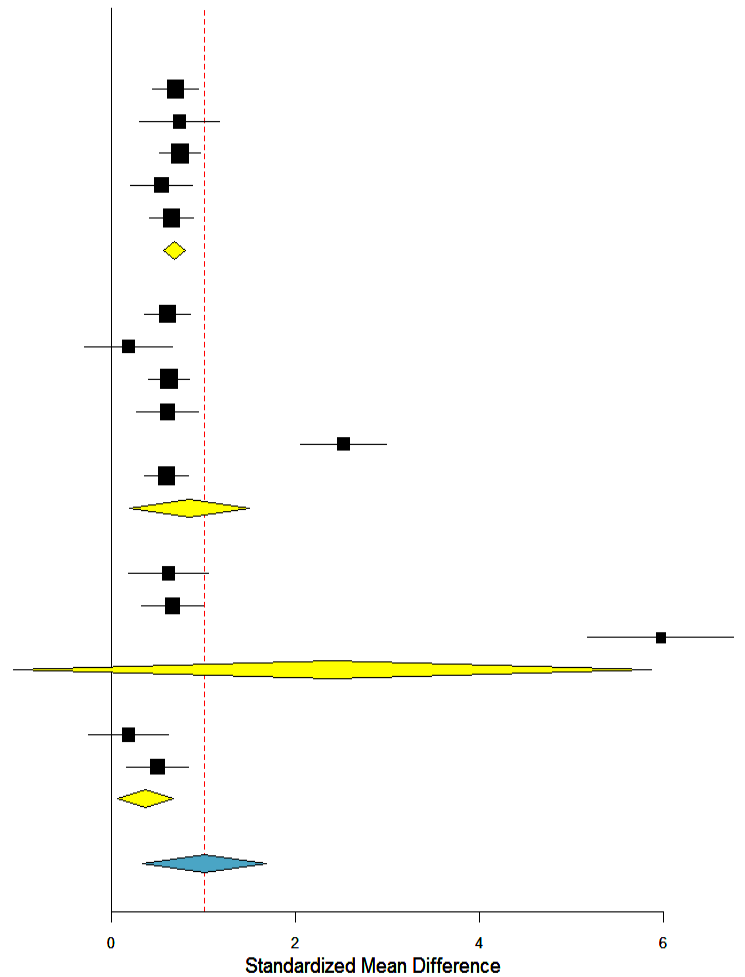

Supplement: 1471-2474-14-332-S3.pdf [file 1471-2474-14-332-S3.pdf]
