# Supplementary material for: Efficacy, safety and tolerability of tofacitinib in patients with an inadequate response to disease modifying anti-rheumatic drugs: a meta-analysis of randomized double-blind controlled studies
Source: PubMed Central journal article supplement (PMC4222887; doi:10.1186/1471-2474-14-332), 2013-11-26

**Additional file 4.** Standardize mean difference of change in LDL cholesterol level from baseline (mg/dl)

| Studies (dose)                                   | SMD          | (95% CI)               |
|--------------------------------------------------|--------------|------------------------|
| Burmester GR et al (10mg)                        | 0.538        | (0.293, 0.782)         |
| Fleischmann R et al study1 (10mg)                | 0.616        | (0.250, 0.983)         |
| Fleischmann R et al study2 (10mg)                | 0.621        | (0.399, 0.842)         |
| Kremer JM et al study1 (10mg)                    | 0.626        | (0.290, 0.962)         |
| van Vollenhoven RF et al (10mg)                  | 0.433        | (0.197, 0.669)         |
| <b>Subgroup 10 (I<sup>2</sup>=0% , P=0.796)</b>  | <b>0.554</b> | <b>(0.436, 0.672)</b>  |
| Burmester GR et al (5mg)                         | 0.520        | (0.275, 0.765)         |
| Fleischmann R et al study1 (5mg)                 | 0.531        | (0.146, 0.917)         |
| Fleischmann R et al study2 (5mg)                 | 0.410        | (0.190, 0.629)         |
| Kremer JM et al study1 (5mg)                     | 0.416        | (0.081, 0.751)         |
| Kremer JM et al study2 (5mg)                     | 2.625        | (2.148, 3.102)         |
| van Vollenhoven RF et al (5mg)                   | 0.679        | (0.439, 0.919)         |
| <b>Subgroup 5 (I<sup>2</sup>=93% , P=0.000)</b>  | <b>0.849</b> | <b>(0.166, 1.533)</b>  |
| Fleischmann R et al study1 (15mg)                | 0.963        | (0.579, 1.348)         |
| Kremer JM et al study1 (15mg)                    | 0.597        | (0.263, 0.932)         |
| Kremer JM et al study2 (15mg)                    | 5.288        | (4.570, 6.006)         |
| <b>Subgroup 15 (I<sup>2</sup>=99% , P=0.000)</b> | <b>2.268</b> | <b>(-0.677, 5.213)</b> |
| Fleischmann R et al study1 (3mg)                 | 0.250        | (-0.127, 0.626)        |
| Kremer JM et al study1 (3mg)                     | 0.350        | (0.012, 0.687)         |
| <b>Subgroup 3 (I<sup>2</sup>=0% , P=0.698)</b>   | <b>0.305</b> | <b>(0.054, 0.556)</b>  |
| <b>Overall (I<sup>2</sup>=94% , P=0.000)</b>     | <b>0.946</b> | <b>(0.337, 1.555)</b>  |

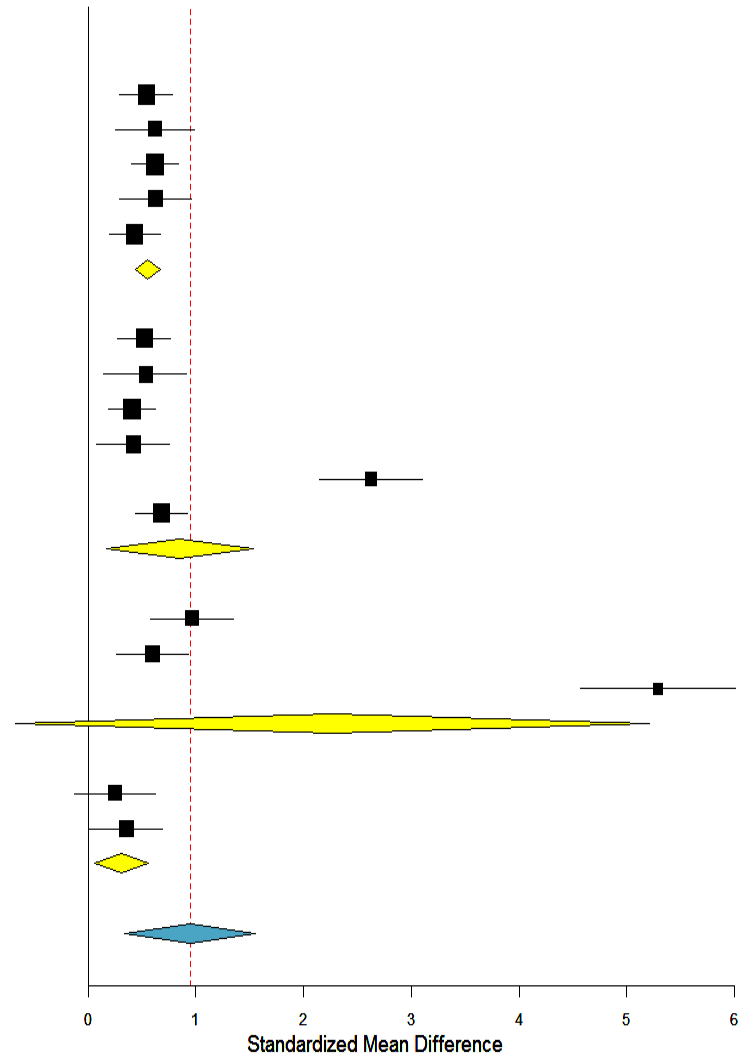

Supplement: 1471-2474-14-332-S4.pdf [file 1471-2474-14-332-S4.pdf]
