# Supplementary material for: Efficacy, safety and tolerability of tofacitinib in patients with an inadequate response to disease modifying anti-rheumatic drugs: a meta-analysis of randomized double-blind controlled studies
Source: PubMed Central journal article supplement (PMC4222887; doi:10.1186/1471-2474-14-332), 2013-11-26

## Additional file 6. Mantel-Haenszel odds ratio of AST>1× ULN range

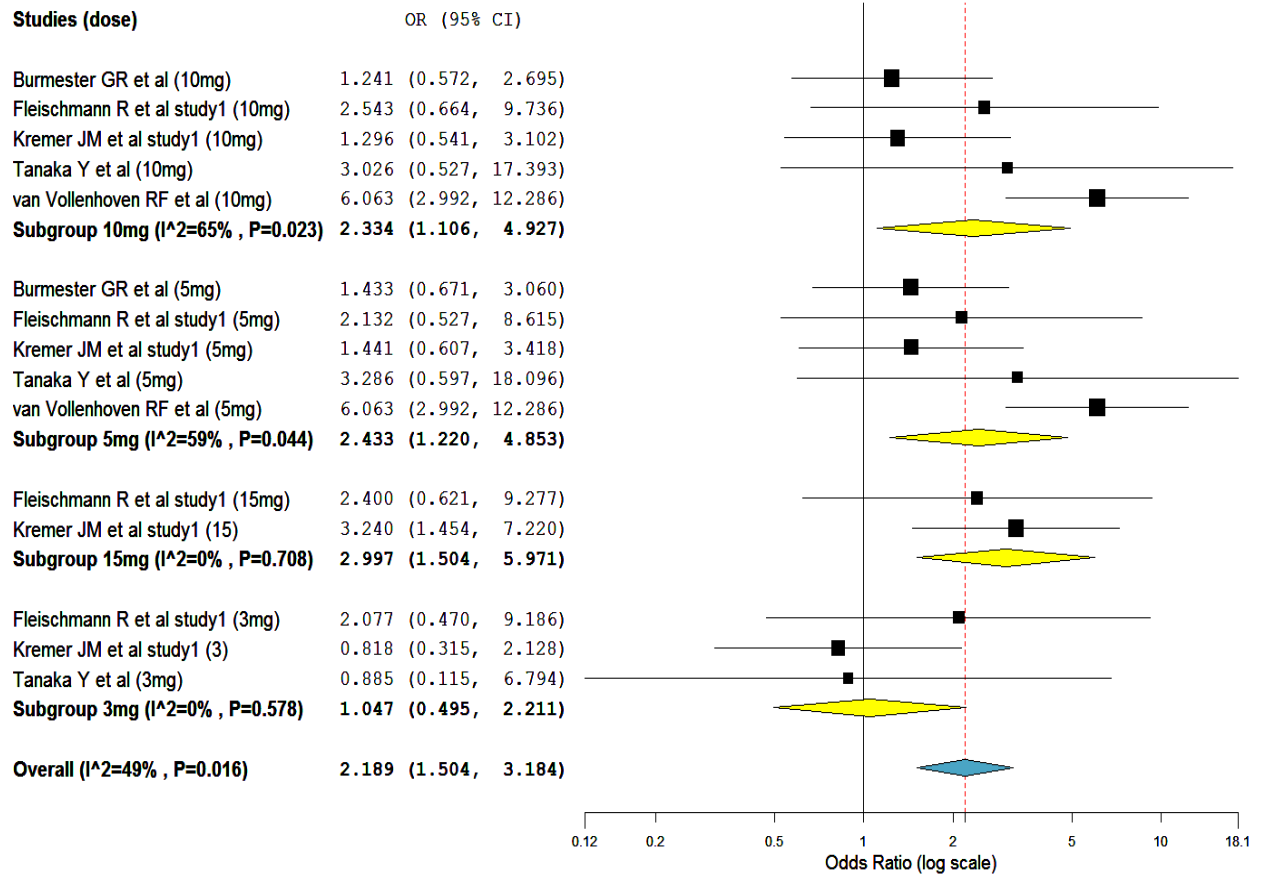

Supplement: 1471-2474-14-332-S6.pdf [file 1471-2474-14-332-S6.pdf]
